# Supplementary material
Source: PubMed Central journal article supplement (PMC4790587)
Supplement: mari003757.ww1_default.pdf [file mari003757.ww1_default.pdf]

## Appendix 1 – Search Terms - Medline

1. Qualitative Research/
2. Nursing Methodology Research/
3. Questionnaires/
4. exp Attitude/
5. Focus Groups/
6. discourse analysis.mp.
7. content analysis.mp.
8. ethnographic research.mp.
9. ethnological research.mp.
10. ethnonursing research.mp.
11. constant comparative method.mp.
12. qualitative validity.mp.
13. purposive sample.mp.
14. observational method\$.mp.
15. field stud\$.mp.
16. theoretical sampl\$.mp.
17. phenomenology/
18. phenomenological research.mp.
19. life experience\$.mp.
20. cluster sampl\$.mp.
21. or/1-20
22. hypertension/
23. 21 and 22
